# Supplementary material
Source: PubMed Central journal article supplement (PMC4751023)
Supplement: NIHMS757721-supplement-Supplemental.pdf [file NIHMS757721-supplement-Supplemental.pdf]

## Supporting Information

# A Personal Nanoparticle Respiratory Deposition (NRD) Sampler

*Lorenzo G. Cena, T. Renée Anthony and Thomas M. Peters\**

**Number of pages: 2**

Figure S1. Experimental setup for the impaction stage evaluation.

Figure S2. Experimental setup for the loading tests to evaluate the impactor's performance.

Figure S3. Experimental setup for the diffusion stage effective deposition tests.

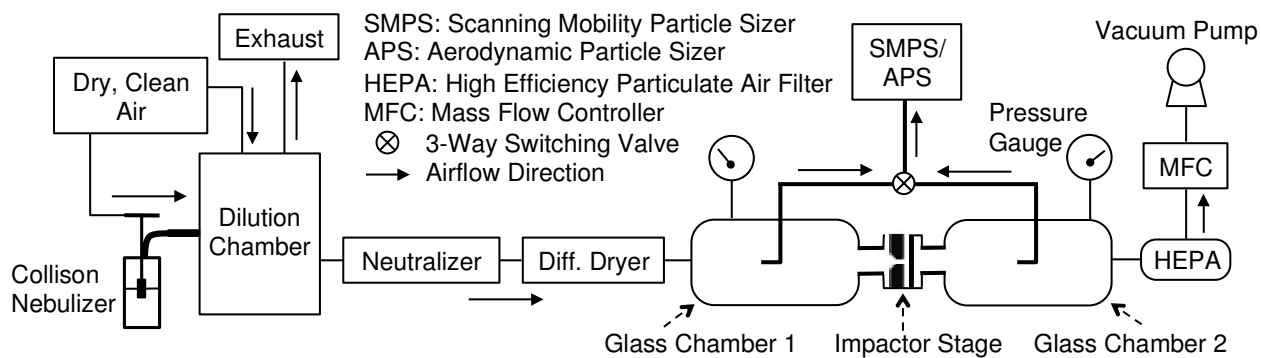

Figure S1. Experimental setup for the impaction stage evaluation.

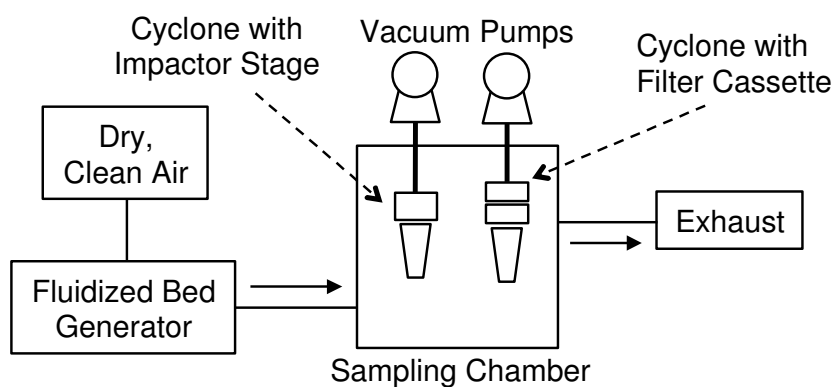

Figure S2. Experimental setup for the loading tests to evaluate the impactor's performance.

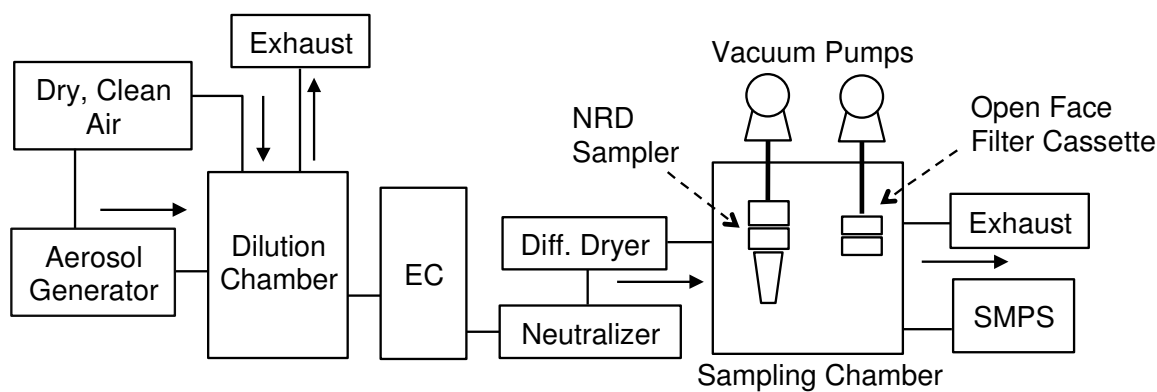

Figure S3. Experimental setup for the diffusion stage effective deposition tests.
